# Supplementary material for: Disparities in Mental Health Care Access Among Persons Differing in Sexual Identity: Nationally Representative Findings
Source: Atypon-hosted journal article supplement (doi:10.1176/appi.ps.202100045), 2021-08-19
Supplement: appi.ps.202100045.ds001.pdf [file appi.ps.202100045.ds001.pdf]

| <b>Supplemental Table. Self-reported mental health, mental healthcare need, healthcare access across sociodemographics.<sup>1</sup></b> |                               |       |                                                             |             |                               |             |                                                                    |       |                                                     |             |                                             |             |                                          |             |                                                         |             |                                           |             |
|-----------------------------------------------------------------------------------------------------------------------------------------|-------------------------------|-------|-------------------------------------------------------------|-------------|-------------------------------|-------------|--------------------------------------------------------------------|-------|-----------------------------------------------------|-------------|---------------------------------------------|-------------|------------------------------------------|-------------|---------------------------------------------------------|-------------|-------------------------------------------|-------------|
|                                                                                                                                         | <b>Full Sample (n=5,932)</b>  |       |                                                             |             |                               |             | <b>Subsample needing behavioral or mental healthcare (n=2,891)</b> |       |                                                     |             |                                             |             |                                          |             |                                                         |             |                                           |             |
|                                                                                                                                         | <b>Total from full sample</b> |       | <b>Those reporting very good or excellent mental health</b> |             | <b>Those needing BMH care</b> |             | <b>Total from subsample</b>                                        |       | <b>Those always able to receive needed BMH care</b> |             | <b>Those who received same-day BMH care</b> |             | <b>Those satisfied with BMH provider</b> |             | <b>Those who would recommend BMH provider to others</b> |             | <b>Those with no barriers to BMH care</b> |             |
|                                                                                                                                         | n <sub>wt</sub>               | %     | n <sub>wt</sub>                                             | %           | n <sub>wt</sub>               | %           | n <sub>wt</sub>                                                    | %     | n <sub>wt</sub>                                     | %           | n <sub>wt</sub>                             | %           | n <sub>wt</sub>                          | %           | n <sub>wt</sub>                                         | %           | n <sub>wt</sub>                           | %           |
| <b>Total</b>                                                                                                                            | 5,953                         | 100.0 | 3,758                                                       | 63.1        | 2,681                         | 45.0        | 2,680                                                              | 100.0 | 2,058                                               | 76.7        | 986                                         | 36.5        | 2,353                                    | 87.8        | 2,120                                                   | 79.1        | 1,703                                     | 63.5        |
| <b>Sexual Identity*Sex<sup>2</sup></b>                                                                                                  |                               |       |                                                             |             |                               |             |                                                                    |       |                                                     |             |                                             |             |                                          |             |                                                         |             |                                           |             |
| Bisexual Female                                                                                                                         | 153                           | 2.6   | 66                                                          | <b>43.1</b> | 110                           | <b>71.9</b> | 110                                                                | 4.1   | 63                                                  | <b>57.2</b> | 59                                          | <b>54.0</b> | 77                                       | <b>69.9</b> | 67                                                      | <b>60.4</b> | 37                                        | <b>33.7</b> |
| Bisexual Male                                                                                                                           | 130                           | 2.2   | 81                                                          | <b>62.3</b> | 95                            | <b>73.3</b> | 95                                                                 | 3.5   | 70                                                  | <b>73.4</b> | 15                                          | <b>13.3</b> | 86                                       | <b>90.3</b> | 80                                                      | <b>84.0</b> | 64                                        | <b>67.5</b> |
| Gay/Lesbian Female                                                                                                                      | 83                            | 1.4   | 56                                                          | <b>67.4</b> | 68                            | <b>81.5</b> | 68                                                                 | 2.5   | 54                                                  | <b>79.3</b> | 19                                          | <b>34.0</b> | 62                                       | <b>91.3</b> | 61                                                      | <b>90.5</b> | 52                                        | <b>76.3</b> |
| Gay Male                                                                                                                                | 111                           | 1.9   | 46                                                          | <b>41.6</b> | 64                            | <b>57.1</b> | 64                                                                 | 2.4   | 39                                                  | <b>61.5</b> | 33                                          | <b>47.7</b> | 48                                       | <b>76.1</b> | 46                                                      | <b>72.2</b> | 37                                        | <b>58.5</b> |
| Heterosexual Female                                                                                                                     | 2800                          | 47.0  | 1574                                                        | <b>56.2</b> | 942                           | <b>33.6</b> | 942                                                                | 35.1  | 711                                                 | <b>75.5</b> | 555                                         | <b>55.0</b> | 800                                      | <b>85.0</b> | 717                                                     | <b>76.1</b> | 567                                       | <b>60.2</b> |
| Heterosexual Male                                                                                                                       | 2596                          | 43.6  | 1895                                                        | <b>73.0</b> | 1358                          | <b>52.3</b> | 1358                                                               | 50.7  | 1094                                                | <b>80.6</b> | 292                                         | <b>23.6</b> | 1240                                     | <b>91.3</b> | 1113                                                    | <b>82.0</b> | 923                                       | <b>68.0</b> |
| Other Female                                                                                                                            | 57                            | 1.0   | 24                                                          | <b>42.5</b> | 31                            | <b>55.3</b> | 31                                                                 | 1.2   | 20                                                  | <b>63.3</b> | 10                                          | <b>42.3</b> | 28                                       | <b>89.8</b> | 25                                                      | <b>78.9</b> | 17                                        | <b>53.3</b> |
| Other Male                                                                                                                              | 24                            | 0.4   | 16                                                          | <b>65.3</b> | 13                            | <b>53.1</b> | 13                                                                 | 0.5   | 7                                                   | <b>52.7</b> | 3                                           | <b>11.5</b> | 12                                       | <b>93.5</b> | 11                                                      | <b>84.6</b> | 7                                         | <b>52.7</b> |
| <b>Age<sup>3</sup></b>                                                                                                                  |                               |       |                                                             |             |                               |             |                                                                    |       |                                                     |             |                                             |             |                                          |             |                                                         |             |                                           |             |
| 18-34                                                                                                                                   | 1845                          | 43.4  | 1291                                                        | <b>70.9</b> | 1222                          | <b>65.0</b> | 1222                                                               | 45.6  | 871                                                 | <b>75.8</b> | 316                                         | <b>26.4</b> | 1089                                     | <b>89.1</b> | 972                                                     | <b>79.6</b> | 729                                       | <b>59.7</b> |
| 35-44                                                                                                                                   | 1028                          | 18.5  | 728                                                         | <b>72.9</b> | 690                           | <b>63.8</b> | 690                                                                | 25.7  | 558                                                 | <b>82.3</b> | 153                                         | <b>24.7</b> | 643                                      | <b>93.2</b> | 570                                                     | <b>82.7</b> | 484                                       | <b>70.2</b> |
| 45-54                                                                                                                                   | 1090                          | 11.8  | 545                                                         | <b>49.3</b> | 425                           | <b>40.4</b> | 425                                                                | 15.9  | 346                                                 | <b>78.0</b> | 274                                         | <b>58.4</b> | 332                                      | <b>78.2</b> | 314                                                     | <b>73.8</b> | 265                                       | <b>62.3</b> |
| 55-64                                                                                                                                   | 956                           | 11.2  | 470                                                         | <b>52.6</b> | 236                           | <b>22.6</b> | 236                                                                | 8.8   | 192                                                 | <b>80.8</b> | 163                                         | <b>66.9</b> | 195                                      | <b>82.7</b> | 177                                                     | <b>75.1</b> | 156                                       | <b>66.2</b> |
| 65+                                                                                                                                     | 1034                          | 15.1  | 723                                                         | <b>70.3</b> | 108                           | <b>9.4</b>  | 108                                                                | 4.0   | 90                                                  | <b>84.5</b> | 81                                          | <b>72.5</b> | 95                                       | <b>88.0</b> | 85                                                      | <b>79.3</b> | 69                                        | <b>64.1</b> |
| <b>Race/Ethnicity<sup>2</sup></b>                                                                                                       |                               |       |                                                             |             |                               |             |                                                                    |       |                                                     |             |                                             |             |                                          |             |                                                         |             |                                           |             |
| Asian/Native Hawaiian/Pacific Islander                                                                                                  | 280                           | 4.1   | 174                                                         | <b>63.4</b> | 129                           | <b>43.6</b> | 129                                                                | 4.8   | 87                                                  | <b>67.0</b> | 45                                          | <b>39.3</b> | 102                                      | <b>78.8</b> | 80                                                      | <b>61.5</b> | 55                                        | <b>42.8</b> |
| Black                                                                                                                                   | 691                           | 8.8   | 419                                                         | <b>62.3</b> | 363                           | <b>51.4</b> | 363                                                                | 13.5  | 253                                                 | <b>67.7</b> | 127                                         | <b>33.8</b> | 317                                      | <b>87.3</b> | 278                                                     | <b>76.6</b> | 200                                       | <b>55.0</b> |
| Hispanic                                                                                                                                | 999                           | 12.6  | 653                                                         | <b>62.4</b> | 514                           | <b>50.5</b> | 514                                                                | 19.2  | 379                                                 | <b>73.6</b> | 155                                         | <b>29.0</b> | 465                                      | <b>90.5</b> | 395                                                     | <b>76.9</b> | 308                                       | <b>59.9</b> |
| Other                                                                                                                                   | 214                           | 3.6   | 116                                                         | <b>52.3</b> | 105                           | <b>50.0</b> | 105                                                                | 3.9   | 62                                                  | <b>63.0</b> | 49                                          | <b>41.1</b> | 74                                       | <b>70.1</b> | 71                                                      | <b>67.6</b> | 50                                        | <b>48.0</b> |
| White                                                                                                                                   | 3770                          | 70.8  | 2395                                                        | <b>68.8</b> | 1569                          | <b>48.3</b> | 1569                                                               | 58.5  | 1276                                                | <b>81.7</b> | 610                                         | <b>39.0</b> | 1396                                     | <b>89.0</b> | 1295                                                    | <b>82.5</b> | 1090                                      | <b>69.5</b> |
| <b>Region<sup>2</sup></b>                                                                                                               |                               |       |                                                             |             |                               |             |                                                                    |       |                                                     |             |                                             |             |                                          |             |                                                         |             |                                           |             |
| Midwest                                                                                                                                 | 1306                          | 17.8  | 765                                                         | <b>59.3</b> | 492                           | <b>41.7</b> | 492                                                                | 18.4  | 373                                                 | <b>77.1</b> | 255                                         | <b>53.5</b> | 404                                      | <b>82.0</b> | 360                                                     | <b>73.2</b> | 304                                       | <b>61.7</b> |
| Northeast                                                                                                                               | 1095                          | 22.9  | 688                                                         | <b>69.6</b> | 534                           | <b>52.5</b> | 534                                                                | 19.9  | 407                                                 | <b>79.9</b> | 193                                         | <b>37.5</b> | 468                                      | <b>87.6</b> | 428                                                     | <b>80.2</b> | 336                                       | <b>62.9</b> |
| South                                                                                                                                   | 2154                          | 33.8  | 1346                                                        | <b>64.8</b> | 933                           | <b>46.5</b> | 933                                                                | 34.8  | 693                                                 | <b>75.2</b> | 337                                         | <b>33.7</b> | 825                                      | <b>88.5</b> | 746                                                     | <b>80.0</b> | 565                                       | <b>60.5</b> |
| West                                                                                                                                    | 1399                          | 25.5  | 959                                                         | <b>71.3</b> | 721                           | <b>53.2</b> | 721                                                                | 26.9  | 583                                                 | <b>80.5</b> | 202                                         | <b>27.7</b> | 657                                      | <b>91.1</b> | 584                                                     | <b>81.0</b> | 499                                       | <b>69.2</b> |
| <b>Education Level<sup>3</sup></b>                                                                                                      |                               |       |                                                             |             |                               |             |                                                                    |       |                                                     |             |                                             |             |                                          |             |                                                         |             |                                           |             |
| Less than High School                                                                                                                   | 2134                          | 17.8  | 1266                                                        | <b>57.5</b> | 978                           | <b>46.8</b> | 978                                                                | 36.5  | 721                                                 | <b>70.5</b> | 382                                         | <b>38.2</b> | 832                                      | <b>85.1</b> | 728                                                     | <b>74.5</b> | 571                                       | <b>58.4</b> |
| High School                                                                                                                             | 1991                          | 25.7  | 1151                                                        | <b>55.6</b> | 776                           | <b>41.5</b> | 776                                                                | 29.0  | 592                                                 | <b>73.8</b> | 365                                         | <b>45.2</b> | 655                                      | <b>84.4</b> | 606                                                     | <b>78.1</b> | 493                                       | <b>63.6</b> |

|                                            |      |      |      |             |      |             |      |      |      |             |     |             |      |             |      |             |      |             |
|--------------------------------------------|------|------|------|-------------|------|-------------|------|------|------|-------------|-----|-------------|------|-------------|------|-------------|------|-------------|
| College                                    | 1165 | 34.0 | 808  | <b>69.8</b> | 552  | <b>48.2</b> | 552  | 20.6 | 426  | <b>77.7</b> | 180 | <b>33.8</b> | 505  | <b>91.4</b> | 454  | <b>82.2</b> | 354  | <b>64.1</b> |
| Graduate Degree                            | 663  | 22.5 | 533  | <b>81.5</b> | 375  | <b>59.5</b> | 375  | 14.0 | 318  | <b>86.9</b> | 60  | <b>17.8</b> | 361  | <b>96.5</b> | 330  | <b>88.2</b> | 285  | <b>76.1</b> |
| <b>Yearly Household Income<sup>2</sup></b> |      |      |      |             |      |             |      |      |      |             |     |             |      |             |      |             |      |             |
| \$24,999 or less                           | 1332 | 15.1 | 628  | <b>44.3</b> | 541  | <b>43.4</b> | 541  | 20.2 | 390  | <b>68.6</b> | 332 | <b>59.4</b> | 430  | <b>79.5</b> | 387  | <b>71.6</b> | 308  | <b>57.1</b> |
| \$25,000 to \$49,000                       | 1412 | 20.1 | 758  | <b>52.0</b> | 496  | <b>36.9</b> | 496  | 18.5 | 373  | <b>69.8</b> | 254 | <b>48.5</b> | 404  | <b>81.5</b> | 386  | <b>77.8</b> | 291  | <b>58.6</b> |
| \$50,000 to \$74,999                       | 1101 | 19.3 | 691  | <b>65.6</b> | 410  | <b>38.3</b> | 410  | 15.3 | 262  | <b>68.6</b> | 187 | <b>43.8</b> | 339  | <b>82.8</b> | 288  | <b>70.2</b> | 198  | <b>48.4</b> |
| \$75,000 to \$99,999                       | 817  | 19.5 | 641  | <b>78.9</b> | 449  | <b>55.7</b> | 449  | 16.8 | 348  | <b>80.6</b> | 96  | <b>22.0</b> | 425  | <b>94.7</b> | 375  | <b>83.6</b> | 304  | <b>67.6</b> |
| \$100,000 or more                          | 1291 | 25.9 | 1040 | <b>82.4</b> | 785  | <b>63.6</b> | 785  | 29.3 | 684  | <b>88.2</b> | 117 | <b>17.5</b> | 755  | <b>96.2</b> | 683  | <b>87.0</b> | 602  | <b>76.7</b> |
| <b>Employment<sup>2</sup></b>              |      |      |      |             |      |             |      |      |      |             |     |             |      |             |      |             |      |             |
| Full Time                                  | 2581 | 49.9 | 1897 | <b>77.0</b> | 1481 | <b>61.7</b> | 1481 | 55.3 | 1175 | <b>82.1</b> | 324 | <b>23.7</b> | 1374 | <b>92.8</b> | 1250 | <b>84.4</b> | 1022 | <b>69.0</b> |
| Part-Time                                  | 945  | 13.4 | 577  | <b>64.1</b> | 480  | <b>48.5</b> | 480  | 17.9 | 352  | <b>70.9</b> | 174 | <b>34.3</b> | 411  | <b>85.7</b> | 368  | <b>76.6</b> | 281  | <b>58.6</b> |
| Retired                                    | 1258 | 17.1 | 760  | <b>63.0</b> | 217  | <b>15.6</b> | 217  | 8.1  | 186  | <b>86.7</b> | 147 | <b>63.7</b> | 185  | <b>85.2</b> | 166  | <b>76.7</b> | 143  | <b>65.9</b> |
| Student/Homemaker                          | 677  | 13.3 | 328  | <b>47.7</b> | 280  | <b>43.0</b> | 280  | 10.4 | 188  | <b>66.5</b> | 171 | <b>61.0</b> | 213  | <b>76.1</b> | 190  | <b>67.7</b> | 139  | <b>49.5</b> |
| Unemployed                                 | 493  | 6.4  | 196  | <b>39.0</b> | 223  | <b>48.5</b> | 223  | 8.3  | 155  | <b>67.8</b> | 170 | <b>68.9</b> | 170  | <b>76.3</b> | 145  | <b>65.2</b> | 119  | <b>53.3</b> |
| <b>Marital Status<sup>2</sup></b>          |      |      |      |             |      |             |      |      |      |             |     |             |      |             |      |             |      |             |
| Single                                     | 1724 | 23.2 | 973  | <b>53.6</b> | 917  | <b>51.8</b> | 917  | 34.2 | 668  | <b>67.6</b> | 405 | <b>42.1</b> | 766  | <b>83.6</b> | 666  | <b>72.6</b> | 515  | <b>56.2</b> |
| Married                                    | 3133 | 64.3 | 2219 | <b>73.7</b> | 1428 | <b>51.3</b> | 1428 | 53.3 | 1152 | <b>82.5</b> | 345 | <b>26.1</b> | 1340 | <b>93.8</b> | 1233 | <b>86.3</b> | 1011 | <b>70.8</b> |
| Widowed                                    | 302  | 3.6  | 170  | <b>57.9</b> | 75   | <b>23.8</b> | 75   | 2.8  | 49   | <b>70.6</b> | 65  | <b>81.2</b> | 53   | <b>70.9</b> | 43   | <b>57.7</b> | 34   | <b>45.2</b> |
| Divorced                                   | 707  | 7.9  | 355  | <b>53.5</b> | 220  | <b>30.8</b> | 220  | 8.2  | 166  | <b>77.2</b> | 145 | <b>62.6</b> | 168  | <b>76.4</b> | 152  | <b>69.4</b> | 123  | <b>56.2</b> |
| Separated                                  | 88   | 1.0  | 40   | <b>46.6</b> | 41   | <b>46.6</b> | 41   | 1.5  | 23   | <b>59.3</b> | 25  | <b>51.3</b> | 26   | <b>64.1</b> | 24   | <b>59.6</b> | 20   | <b>48.0</b> |

$n_{wt}$  refers to weighted frequency. Totals for weighted frequencies differ slightly from unweighted frequency totals. Weighted frequencies are discretely rounded. Percentages are calculated from unrounded weighted frequencies.

<sup>1</sup>Significant ( $p < .05$ ) associations bolded.

<sup>2</sup>Proportion differences tested using Chi-Square test.

<sup>3</sup>Proportion differences tested using Cochran-Armitage trend test.

<sup>4</sup>Differences with sociodemographic factors tested using Kruskal-Wallis test for multicategorical factors, Cochran-Armitage test of trend for binary factors, and Mantel-Haenzsel Chi-Square test for ordinal factors.

**Supplemental Figure.** Adjusted proportions of behavioral mental healthcare factors across sexual identity and sex.

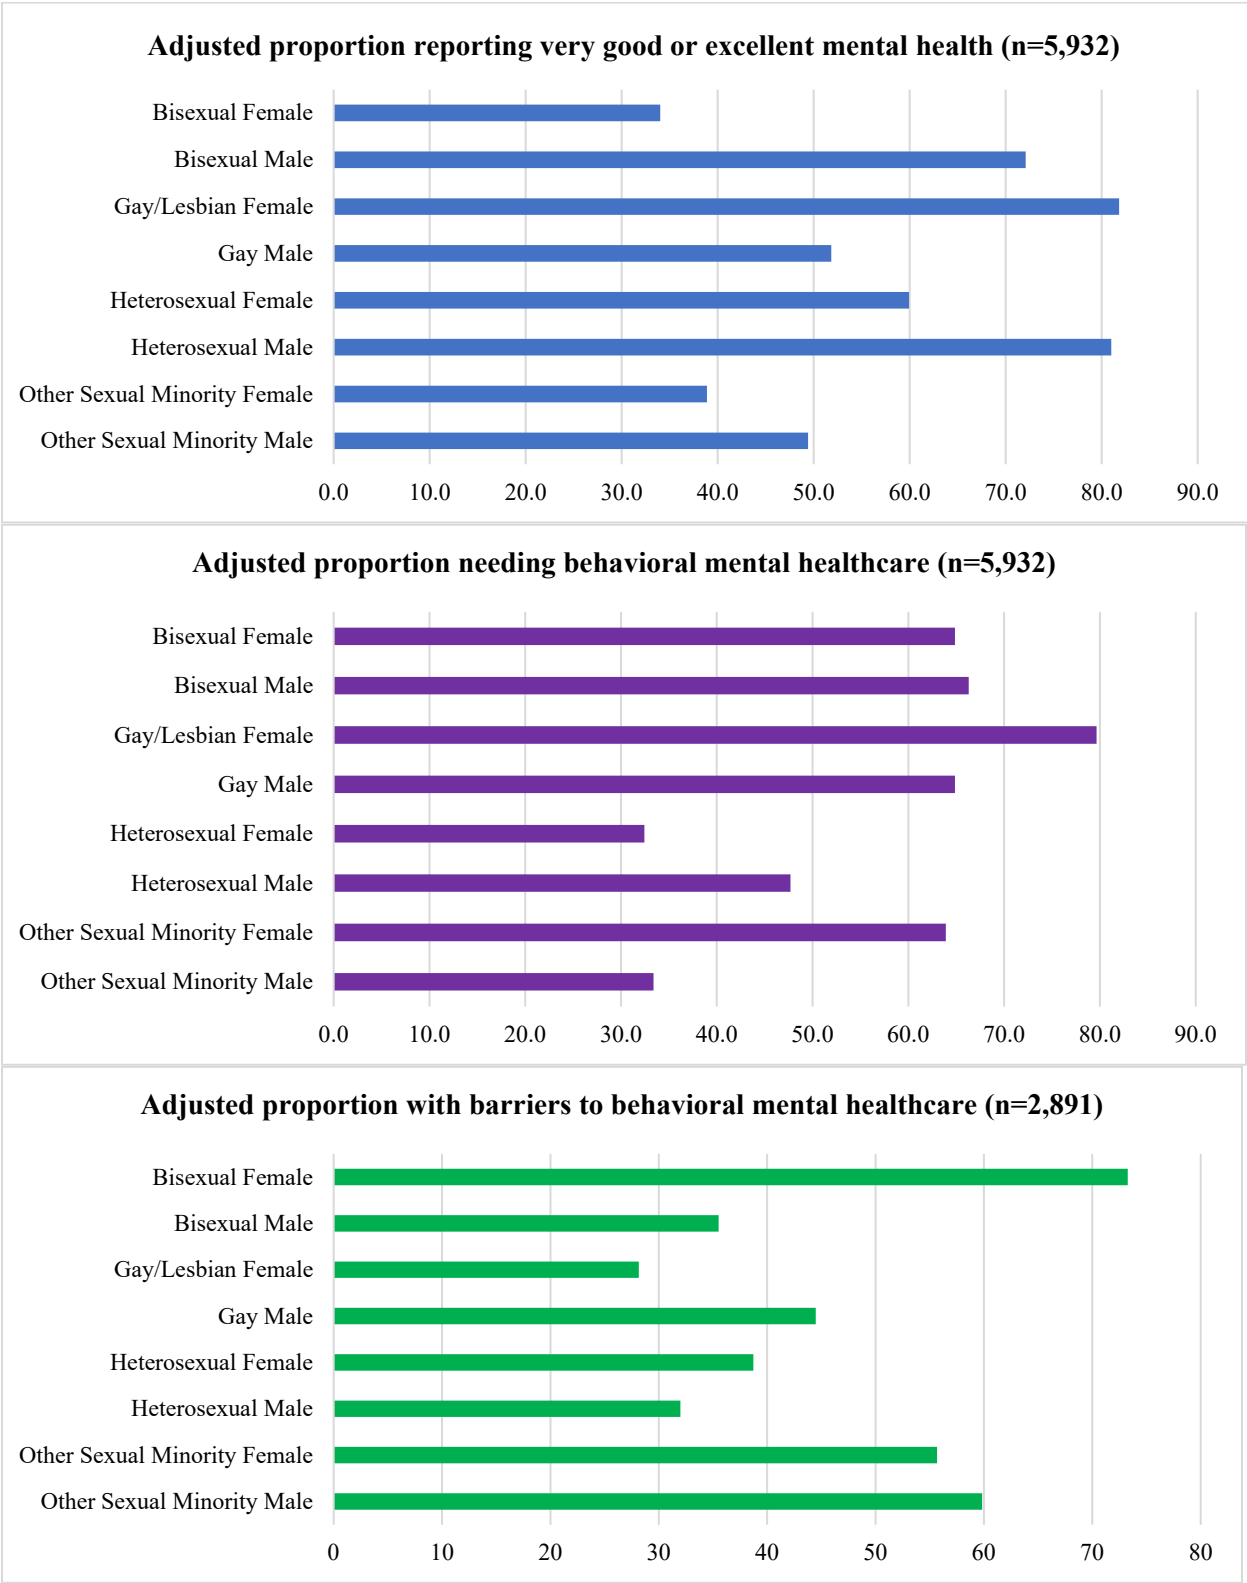

Proportions are adjusted for age, race/ethnicity, region, education, income, employment, and marital status.
